# Supplementary material for: Synthesis and mesomorphism of fluoroalkylated organometallic mesogens
Source: Royal Society of Chemistry journal article supplement (doi:10.1039/b511758e), 2005-11-23
Supplement: b511758e.pdf [file b511758e.pdf]

### Experimental conditions for X-ray scattering

Powder X-ray investigations were carried out with a Guinier film camera and a Guinier Goniometer (Huber Diffraktionstechnik, Germany). Samples in glass capillaries ( $\varnothing$  1 mm) in a temperature-controlled heating stage, quartz-monochromatized  $\text{CuK}\alpha$  radiation, 30 to 60 min exposure time, calibration with the powder pattern of  $\text{Pb}(\text{NO}_3)_2$ . 2D patterns for aligned samples on a glass plate on a temperature-controlled heating stage (alignment at the sample – glass or at the sample – air interface) were recorded with a 2D detector (HI-STAR, Siemens) using  $\text{CuK}\alpha$  radiation monochromatized by a Ni filter.

**Table S1.** X-ray data from Guinier powder patterns ( $\theta_{\text{obs}}$ : experimental scattering angle;  $d_{\text{obs}}$ : experimental and  $d_{\text{calc}}$ : calculated d spacing;  $hk/n$ : assigned indices for  $\text{Col}_{\text{hex}}$  phases / order of reflection for SmA phases, Parameter used: Lattice parameters or  $d$  values used to calculate  $d_{\text{calc}}$  with an error of the calculated parameters in the order of 0.1 nm)

| Compound  | $T$<br>(°C) | Phase                     | $\theta_{\text{obs}}$<br>(°) | $d_{\text{obs}}$<br>(nm) | $hk/n$ | $d_{\text{calc}}$<br>(nm) | $d_{\text{obs}} - d_{\text{calc}}$<br>(nm) | Parameter<br>used (nm) |
|-----------|-------------|---------------------------|------------------------------|--------------------------|--------|---------------------------|--------------------------------------------|------------------------|
| <b>5b</b> | 120         | $\text{Col}_{\text{hex}}$ | 1.713                        | 2.58                     | 10     | 2.55                      | 0.03                                       | $a = 2.95$             |
|           |             |                           | 3.021                        | 1.46                     | 11     | 1.47                      | -0.01                                      |                        |
|           |             |                           | 3.450                        | 1.28                     | 20     | 1.28                      | 0.00                                       |                        |
| <b>5c</b> | 160         | $\text{Col}_{\text{hex}}$ | 1.712                        | 2.58                     | 10     | 2.59                      | -0.01                                      | $a = 2.99$             |
|           |             |                           | 2.953                        | 1.49                     | 11     | 1.49                      | 0.00                                       |                        |
|           |             |                           | 3.400                        | 1.30                     | 20     | 1.29                      | 0.01                                       |                        |
| <b>6b</b> | 115         | SmA                       | 1.472                        | 3.00                     | 1      | 3.00                      | 0.00                                       | $d = 3.00$             |
|           |             |                           | 2.952                        | 1.50                     | 2      | 1.50                      | 0.00                                       |                        |
| <b>6c</b> | 140         | SmA                       | 1.450                        | 3.04                     | 10     | 3.00                      | 0.04                                       | $d = 3.00$             |
|           |             |                           | 2.923                        | 1.51                     | 11     | 1.50                      | 0.01                                       |                        |
|           |             |                           | 4.507                        | 0.98                     | 20     | 1.00                      | -0.02                                      |                        |
